# Supplementary material
Source: publisher figshare collection journal article supplement (https://springernature.figshare.com/articles/dataset/_/14045951)
Supplement: Supplementary file 1 [file 1]

## Sheet: 1a
	FUDR Dose	FUDR Alone												siDUT												Plus 12.5mM 530
	0	93.6232	106.377	95.5767	101.859	102.564	99.837	100.163						102.407	96.193	101.4	91.2734	98.7391	109.987			95.7825	98.6039	105.614		87.9542	92.0134			72.0535	77.0485
	0.05	128.289	121.686	92.7016	104.498	116.597	76.2124	83.4847	81.5332	94.4637	90.0325	103.597		64.3136	54.7561	99.7032	99.0209	95.4129	43.7222	56.2536	54.6797	47.3364	56.6479	53.0235		48.7714	59.0545	47.9431	47.8106	44.8132	49.8871
	0.1	132.545	87.6276	89.311	106.978	130.139	66.2862	78.2057	88.9621	85.9988	86.1972	96.0636		62.0755	57.8623	88.9856	44.8135	72.3802	70.0468			47.0317	55.3355	50.6425		50.3408	29.2064	45.6086	47.3614	41.4043	39.019
	0.2	125.319	128.459	66.4844	81.5332	94.4637	56.3892	80.5525	77.2648	93.2716				56.0224	41.3573	43.7222	56.2536	54.6797				45.8871	42.8555	46.6225		46.5314	33.62	45.3202	41.3471	39.9474	34.8286
	0.5	123.568	122.367	64.2538	88.9621	85.9988	47.8928	50.8158	66.2529	66.4519	63.3017	65.348	73.6125	59.4305	38.2481	44.8135	21.9664	44.6169	41.4906			33.4238	36.8766	37.0076		32.102	37.8528	30.7306	34.1322	34.2975	31.5012
	1	104.592	106.805	66.2529	66.4519	63.3017	36.7933	34.1249	67.0814	72.0519	72.2756	63.8044	70.1954	24.2671	19.6417	21.9664	44.6169	41.4906	26.5776	30.7374	30.8461	26.434	27.8969	30.0702		21.2478	17.0705	27.6447	30.5915	30.6362	29.0551
	1.5	114.945	73.8991	67.0814	72.0519	72.2756	38.6943	39.2013	58.8075	60.5255				23.1832	22.1469	26.5776	30.7374	30.8461				21.1301	26.9086	22.8058		14.0251	12.5469	23.3848	24.2516	23.5485	26.9649
	2	50.1121	38.7767	35.1079	41.5334	49.0531	37.5223	36.0895	51.7375	60.0784				16.8022	10.5731	12.5551	14.7469	18.3674				19.7829	20.3559	24.27		13.2482	9.14376	20.8321	21.2073	20.841	18.2164
	5	28.3184	25.3262	21.3532	24.7101	23.2295	37.5075	37.043	35.1079	41.5334	49.0531	42.2801	51.4589	8.71569	9.57831	11.8375	8.99568	12.1559	12.5551	14.7469	18.3674	14.8818	18.3803	18.4259		9.84296	6.57142	13.0846	12.8049	12.1887	12.7658
	10	5.47272	9.00988	10.9197	12.7887	13.3934	34.9704	39.7461	21.3532	24.7101	23.2295	25.8201	28.0902	7.7396	7.84637	7.25364	11.564	10.2698	11.8375	8.99568	12.1559	19.4193	18.3141	18.0066		6.04484	6.7118	11.5329	9.97412	8.12467	9.00007

## Sheet: 1b
	FUDR Dose	FUDR Alone								siDUT						Plus 12.5mM 530
	0	92.9537	107.046	75.8308	89.5319	134.637	83.6211	112.383	103.996	132.791	102.702	119.524	110.358	110.217	83.54	131.476	105.878	105.773		153.945	125.753	114.957	105.978	86.1238
	0.005	82.7494	101.841				83.3151	94.9058	110.569	51.7012	40.1178	31.1956	71.8486	73.2861	73.5813	51.1893	41.3586	27.6068				74.8423	70.4674	75.857
	0.01		59.5873				91.1044	117.198	119.391	22.579	18.8291	17.0053	76.6345	77.618	58.6461	22.3555	19.4115	15.049				79.8276	74.6327	60.4599
	0.1	49.659	54.4989	82.1453	109.272	126.066	55.9392	75.91	91.6156	13.8773	12.722	13.2253	25.312	25.7922	20.067	13.7399	13.1155	11.7038	81.2882	56.0606	42.5914	26.3667	24.8002	20.6877
	0.2	37.284	44.1931	74.2924	110.714	103.227	43.206	59.4176	62.7596	11.231	8.77478	6.43956	14.6869	20.4489	15.1762	11.1198	9.04616	5.69873	63.8849	42.1673	32.2537	15.2988	19.6624	15.6456
	0.5	22.8	27.0408	63.0979	101.578	114.04	33.615	42.8038	48.7785	7.96268	5.56884	4.91823	11.4044	11.5634	7.10367	7.88384	5.74108	4.35242	38.2527	34.6369	24.7681	11.8796	11.1187	7.32337
	1	15.648	18.0512	57.4997	72.2819	89.8369	26.601	33.7223	36.3156	7.01546	6.21598	5.11409	10.7744	9.52784	7.10933	6.946	6.40823	4.52574	31.5403	26.4043	12.9785	11.2234	9.16139	7.32921
	2	8.45901	10.1062	41.4533	37.1303	51.467	13.914	17.1726	20.5776	6.27302	4.28401	3.25338	6.67091	7.60794	3.86435	6.21091	4.4165	2.87909	27.6933	16.3343	10.9122	6.94886	7.31533	3.98387
	10	4.84194	4.78882	27.7869	33.9146	38.0311	9.60046	7.50832	8.59552	5.39843	3.43654	3.3325	4.99167	5.0434	3.06671	5.34498	3.54282	2.94912	11.1752	9.70908	7.67779	5.19966	4.84942	3.16156
	50	4.3672	4.74028				7.32589	7.2438	7.17506	4.82663	3.96228	3.76396	4.71042	4.9695	3.47256	4.77884	4.08482	3.33094				4.90669	4.77837	3.57996

## Sheet: 1c
	FUdR IC50
	FUdR	siDUT	530
	2.266	0.1932	0.05858
	2.881	0.2424	0.07718
	1.782	0.1541	0.04446

## Sheet: 1d
	FUdR IC50
	FUdR	siDUT	530
	0.6406	0.007525	0.009103
	1.005	0.01187	0.02056
	0.4085	0.00477	0.00403

## Sheet: 1e
	FUdR Dose	Ntsi																					siDUT																					530
	0	1.33824	1.13235	0.823529	0.926471	1.13235	0.823529	0.823529	1.03871	1.17419	1.17419	1.21935	1.03871	0.677419	0.677419	1.03871	1.17419	1.17419	1.21935	1.03871	0.677419	0.677419	1.09756	1.09756	0.97561	0.487805	1.34146	1.01852	0.87963	0.833333	1.06482	1.2037	1.01852	0.87963	0.833333	1.06482	1.2037							0.926471	1.17419	0.858065	1.17419	0.858065
	0.025	0.926471	1.02941	0.903226	0.903226																		0.365854	0.97561	0.509259	0.648148	0.509259	0.648148																0.411765	0.308823	0.451613	0.270968	0.451613	0.270968
	0.05	1.02941	0.926471	0.948387	0.767742	0.948387	0.767742																0.853658	0.609756	0.231482	0.740741	0.231482	0.740741																0.514706	0.308823	0.36129	0.225806	0.36129	0.225806
	0.1	1.02941	0.823529	0.903226	0.903226																		0.121951	0.365854	0.185185	0.277778	0.185185	0.277778																0.308823	0.514706	0.0903226	0.180645	0.0903226	0.180645
	0.25	0.823529	1.23529	0.677419	0.858065	0.677419	0.858065																0.243902	0.365854	0.0462963	0.138889	0.0462963	0.138889																0.205882	0.102941	0.135484	0.0451613	0.135484	0.0451613
	0.5	0.411765	0.720588	0.767742	0.587097	0.767742	0.587097																0	0	0.185185	0.185185	0.185185	0.185185																0.205882	0.205882	0	0.0903226	0	0.0903226

## Sheet: 1f
	FUdR Dose	Ntsi								siDUT								530
	0		0.827586	0.758621	1.37931	1.03448	0.727273	1.27273			0.866667	1.13333	1.14286	0.857143					0.896552	0.965517	0.909091	0.818182
	0.01		1.10345	1	1.37931	0.827586	1	1			0.933333	0.533333	0.866667	0.571429	0.428571				0.413793	0.62069	0.62069	0.181818	0.272727
	0.05		0.827586	0.896552	1.03448	0.636364	1.45454	0.909091			0.533333	0.666667	0.333333	0	0				0.413793	0.689655	0.482759	0.0909091	0
	0.1		0.965517	0.896552	0.689655	0.827586	0.909091	1.09091	1.36364		0.6	0.0666667	0.266667	0	0				0.413793	0.62069	0.689655	0.344828	0	0
	0.25		0.758621	0.62069	0.551724	1	0.545455	0.363636	0.454545	0.454545	0.333333	0	0.2	0	0				0.344828	0.275862	0.206897	0	0
	0.5		0.758621	0.689655	0.482759	0.896552	0.181818	0.181818			0.2	0.2	0.0666667	0.333333	0	0			0.206897	0.206897	0.206897	0.275862	0	0

## Sheet: 1g
	FUdR Dose	Ntsi																		siDUT																											530
	0.01	1.056	0.928	0.704	1.28	1.152	0.928	0.672	1.28	0.574468	0.957447	0.893617	0.893617	1.40426	1.2766	0.598425	0.629921	1.10236	1.66929		0.914634	0.609756	1.58537	0.609756	0.75969	1.08527	0.596899	0.922481	1.62791	1.13953	0.868217	1.24528	1.38365	0.968553	0.761006	1.52201	0.968553	0.691824	0.691824	1.03774	0.761006	0.968553	0.884211	0.842105	1.09474	1.17895	1.12	0.736	0.893617
	0.025	0.896	0.832	0.765957	0.702128	1.51181	0.818898														1.09756	1.1938	0.705426	0.968553	1.17895	0.8																					0.32	0.608	1.08511
	0.05	0.831683	1.0099	0.964286	1.04464	0.5	1	0.741177	1.27059												0.426829	0.365854	0.542636	0.813953	0.484277	0.484277	0.547368	0.673684																			0.544	0.255319	0.510638
	0.075	1	0.653465	0.924107	0.723214	0.85	0.3	0.635294	0.635294												0.487805	0.426829	0.271318	0.325581	0.207547	0.207547	0.589474	0.421053																			0.704	0	0.0638298
	0.1	0.772277	0.594059	0.522321	0.84375	0.45	0.8	0.811765	0.882353												0.121951	0.243902	0.217054	0	0.0691824	0.207547	0.294737	0.168421																			0.16	0.128	0.191489
	0.15	0.356436	0.950495	0.482143	0.28125	0.15	0.35	0.458823	0.564706												0.121951	0.304878	0.0542636	0.108527	0.207547	0.138365	0.168421	0																			0.256	0.16	0
[truncated: 5 more columns]

## Sheet: 1h
	Epirubicin Dose	Ntsi									siDUT							530
	0	1.0396	1.10891	1.10891	0.831683	0.970297	0.831683	1.10891	0.909091	1.09091	0.902778	1.04167	0.902778	0.902778	1.25	1	1	1.17822	0.970297	0.831683	1.27273	0.909091
	0.01	0.970297	0.762376	0.623762	0.415842	1.45454	0.909091				0.555556	0.486111	0.486111	0.694444	0.875	1.25		0.90099	0.970297	0.762376	0.90099	0.909091	1.09091
	0.015	0.762376	0.623762	0.693069	0.485148	0.727273	0.909091				0.416667	0.555556	0.277778	0.277778	0.875	0.75		0.623762	0.693069	0.346535	0.346535	0.909091	1.27273
	0.02	0.693069	0.693069	0.623762	0.545455	0.545455					0.590278	0.0694445	0.25	0				0.346535	0.138614	0.277228	0.181818	0.181818
	0.05	0.554455	0.346535	0.277228	0.485148	0.363636	0.363636				0.0694445	0.138889	0.138889	0	0.25	0.125		0.0693069	0.207921	0.138614	0	0.181818	0
	0.075	0.138614	0.0693069	0.138614	0.0693069	0.181818	0.363636				0.0694445	0.138889	0	0	0	0		0.0693069	0.0693069	0.0693069	0	0	0
